# Supplementary material for: The prolactin receptor (PRLR) gene is linked to and associated with the comorbidity of depression and type 2 diabetes in Italian families
Source: PubMed Central journal article supplement — Genes Dis. 2023 Jul 28;11(3):101048. doi: 10.1016/j.gendis.2023.06.018 (PMC10806260; doi:10.1016/j.gendis.2023.06.018), 2023-07-28

**Supplemental Figure 1.** *PRLR* MDD and T2D risk SNPs and MDD-T2D comorbid SNPs

***PRLR* MDD and T2D Risk SNPs and MDD-T2D Comorbid SNPs**

**Depression (MDD)**  
**Type 2 Diabetes (T2D)**

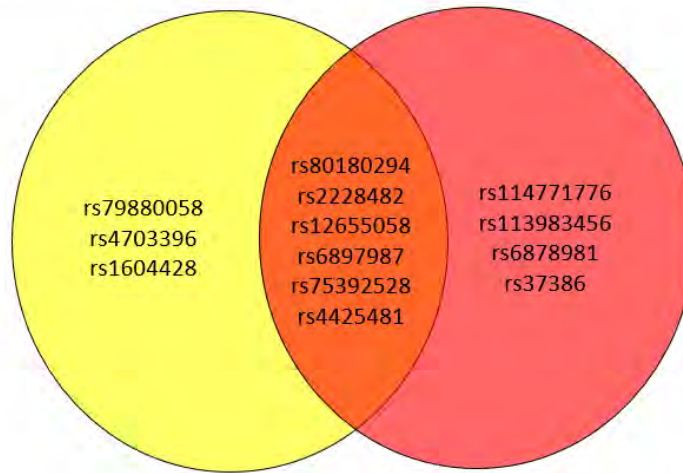

Supplement: mmc1.pdf [file mmc1.pdf]
